# Supplementary material
Source: PubMed Central journal article supplement (PMC8237839)
Supplement: jcrsu-32-e439-s001.pdf [file jcrsu-32-e439-s001.pdf]

Supplemental Table 1 COVID-19 positive patients relative to the degree of smell disorder

| Degree of smell disorder | Number of patients | COVID-19 +ve patients |
|--------------------------|--------------------|-----------------------|
| 0                        | 15                 | 14/15 (93%)           |
| 1                        | 22                 | 21/22 (95%)           |
| 2                        | 8                  | 6/8 (75%)             |
| 3                        | 4                  | 4/4 (100%)            |
| 4                        | 3                  | 3/3 (100%)            |
| 5                        | 14                 | 14/14 (100%)          |
| 6                        | 2                  | 0/2 (0%)              |
| 7                        | 5                  | 4/5 (80%)             |
| 8                        | 11                 | 11/11 (100%)          |
| 9                        | 13                 | 11/13 (85%)           |
| 10                       | 383                | 3/50 (6%)             |
